# Supplementary material for: Structural alignment of protein descriptors – a combinatorial model
Source: PubMed Central journal article supplement (PMC5027075; doi:10.1186/s12859-016-1237-9), 2016-09-17
Supplement: 12859_2016_1237_MOESM1_ESM.pdf [file 12859_2016_1237_MOESM1_ESM.pdf]

# 1 Supplementary figures

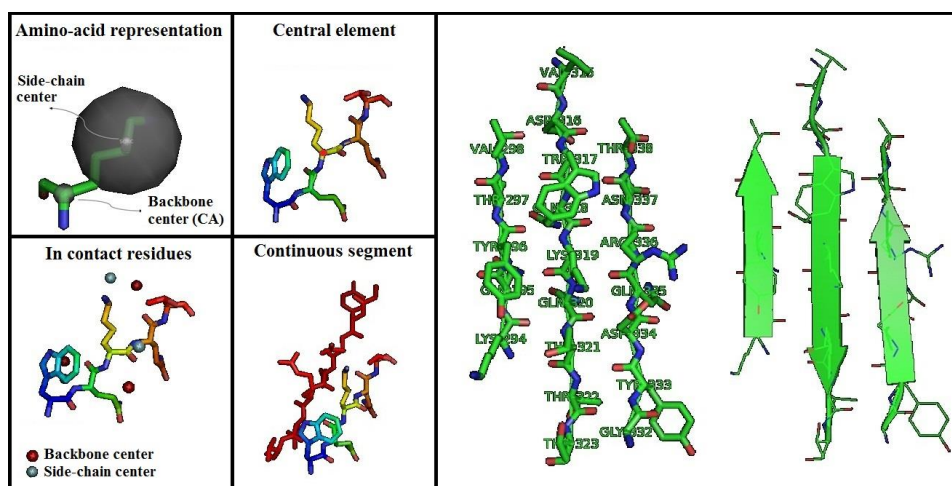

Figure Sf1: A scheme of building a protein descriptor

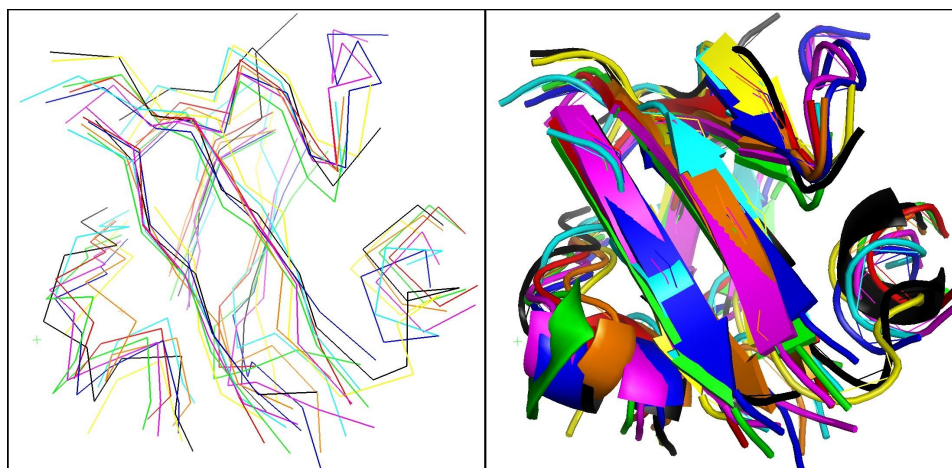

Figure Sf2: Visualization of an example group of descriptors. The group consists of eight descriptors including the founder, which is marked with black. The visualization of a superposition of descriptors is presented in the following views: the descriptor backbones only (on the left) and the cartoon view (on the right)

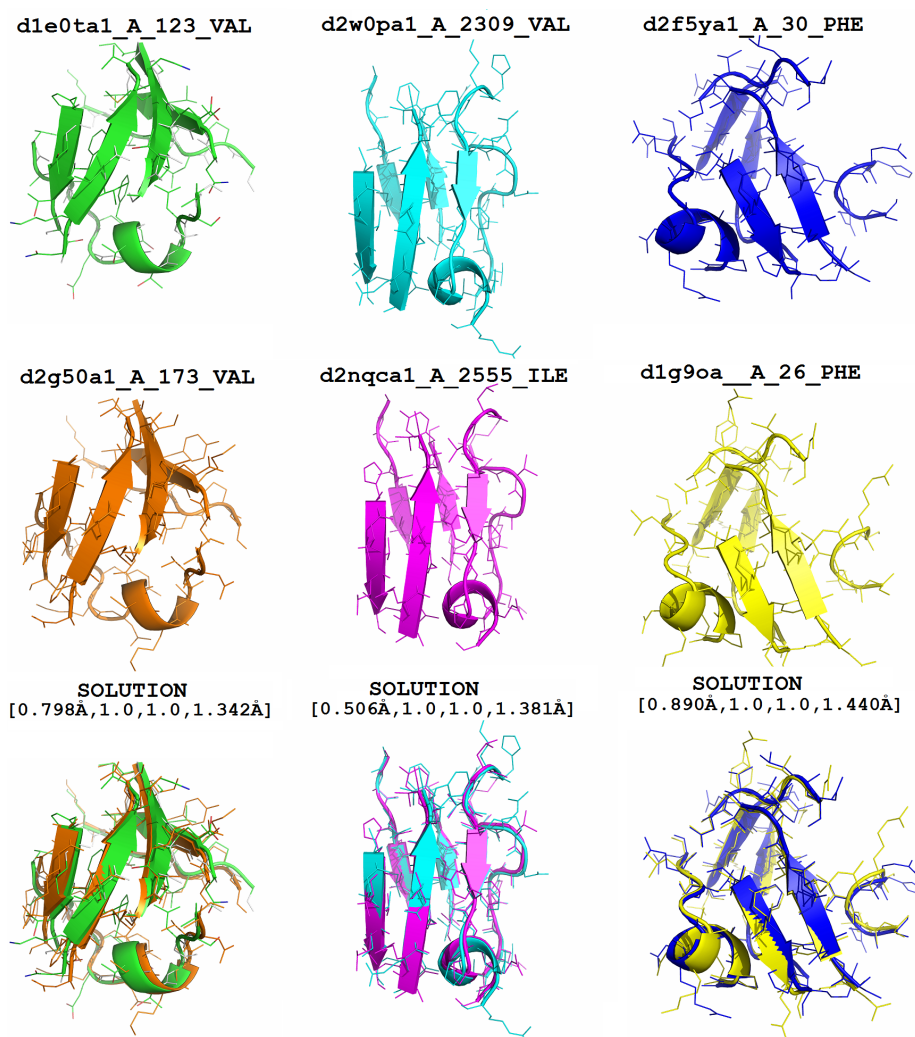

Figure Sf3: Visualization of instances of the problem and the corresponding optimal solutions. First two rows present descriptors that are compared and the third one is for their optimal structural alignment

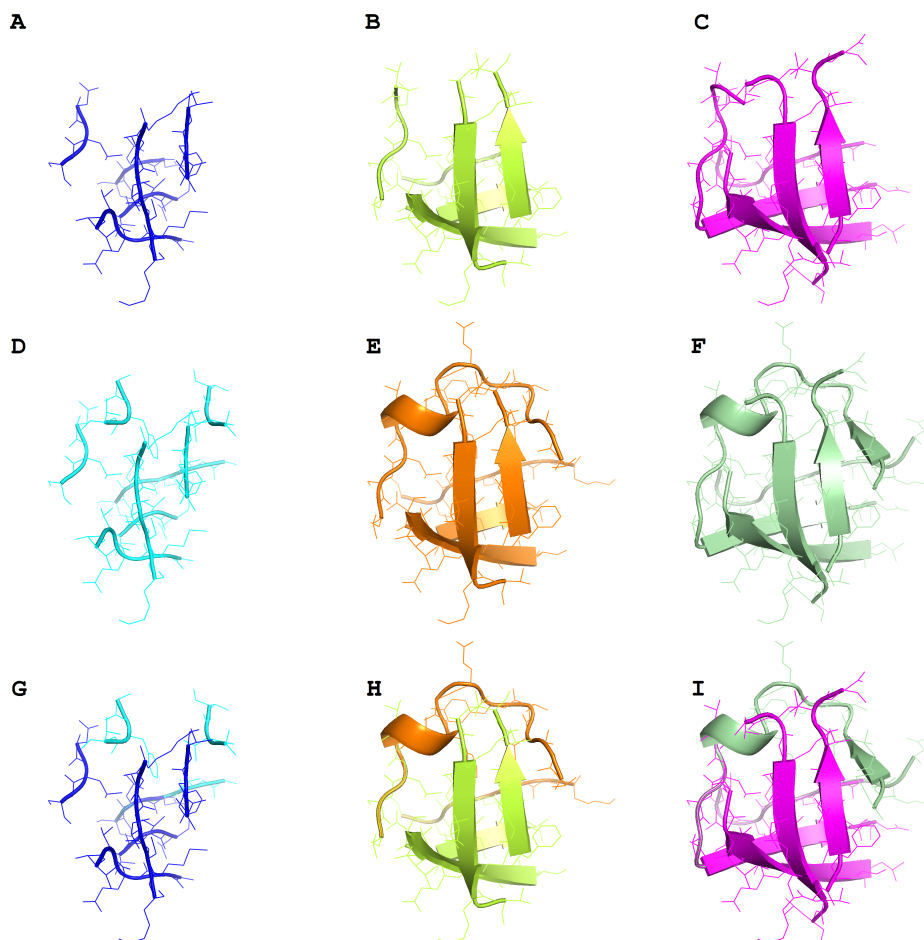

Figure Sf4: Visualization of structural motifs constructed in the proximity of residue A123-VAL (d1e0ta1) according to the building concept of descriptors taking into consideration the following values of element size: 3 [ES1], 5 [ES2], 7 [ES3], as well as two general types of expressions for identification of in-contact residues, namely “OR(DISTANCE:CBX  $\leq$  6.5, AND(DISTANCE:CBX  $\leq$  DISTANCE:CA - 0.75, DISTANCE:CBX  $\leq$  8.0))” [EXP1] and “OR(DISTANCE:SCGC  $\leq$  6.5, AND(DISTANCE:SCGC  $\leq$  DISTANCE:CA - 0.75, DISTANCE:SCGC  $\leq$  8.0))” [EXP2]. In these expressions, the following residue representatives are used: CA ( $C_{\alpha}$ ), CBX ( $C_{\beta}$ -extended point) (Hvidsten, Kryshafovich and Fidelis, 2009), and SCGC (geometrical center of side-chain). Table St6 contains detailed information about the structural motifs. (A) Visualization prepared for parameters ES1, EXP1, (B) ES2, EXP1, (C) ES3, EXP1, (D) ES1, EXP2, (E) ES2, EXP2, (F) ES3, EXP2. (G) Visualization of superimposed 3D structures of motifs from figures A and D, (H) B and E, (I) C and F

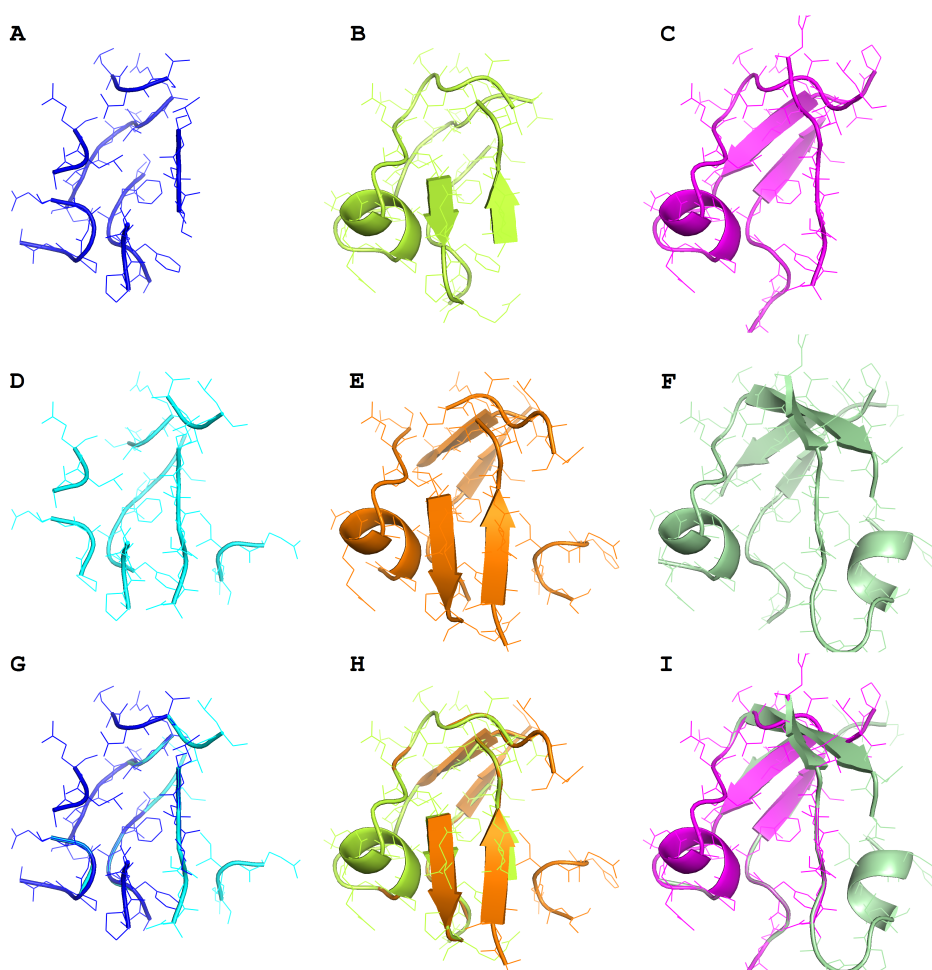

Figure Sf5: Visualization of structural motifs constructed in the proximity of residue A30-PHE (d2f5ya1) according to the building concept of descriptors taking into consideration the following values of element size: 3 [ES1], 5 [ES2], 7 [ES3], as well as two general types of expressions for identification of in-contact residues, namely “OR(DISTANCE:CBX  $\leq$  6.5, AND(DISTANCE:CBX  $\leq$  DISTANCE:CA - 0.75, DISTANCE:CBX  $\leq$  8.0))” [EXP1] and “OR(DISTANCE:SCGC  $\leq$  6.5, AND(DISTANCE:SCGC  $\leq$  DISTANCE:CA - 0.75, DISTANCE:SCGC  $\leq$  8.0))” [EXP2]. In these expressions, the following residue representatives are used: CA ( $C_{\alpha}$ ), CBX ( $C_{\beta}$ -extended point) (Hvidsten, Kryshatovych and Fidelis, 2009), and SCGC (geometrical center of side-chain). Table St7 contains detailed information about the structural motifs. (A) Visualization prepared for parameters ES1, EXP1, (B) ES2, EXP1, (C) ES3, EXP1, (D) ES1, EXP2, (E) ES2, EXP2, (F) ES3, EXP2. (G) Visualization of superimposed 3D structures of motifs from figures A and D, (H) B and E, (I) C and F



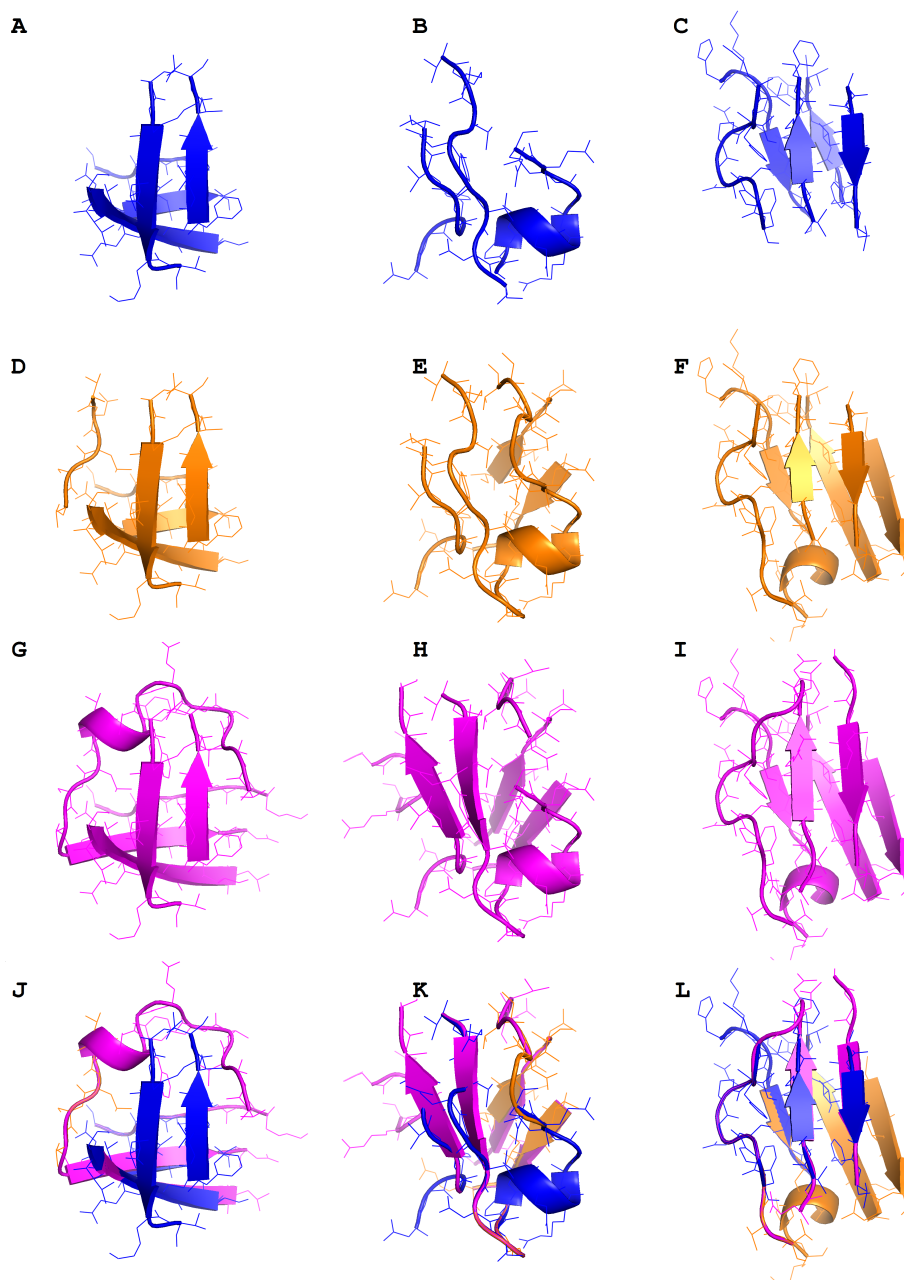

Figure Sf6: Visualization of 3D structures of descriptors constructed in the proximity of three example residues, namely A123-VAL (d1e0ta1) [RES1], A30-PHE (d2f5ya1) [RES2], and A2309-VAL (d2w0pa1) [RES3] by various expressions for identification of in-contact residues published in the literature. They are “DISTANCE:CBX < 6.5” (Hvidsten *et al.*, 2003; Hvidsten, Laegreid *et al.*, 2009) [EXP1, in blue], “OR(DISTANCE:CBX < 6.5, AND(DISTANCE:CBX < DISTANCE:CA – 0.75, DISTANCE:CBX < 8.0))” (Hvidsten, Kryshtafovych and Fidelis, 2009) [EXP2, in orange], “OR(DISTANCE:CA ≤ 6.5, AND(DISTANCE:SCGC ≤ DISTANCE:CA – 0.75, DISTANCE:SCGC ≤ 8.0))” (Daniluk and Lesyng, 2011) [EXP3, in magenta]. In these expressions, the following residue representatives are used: CA ( $C_{\alpha}$ ), CBX ( $C_{\beta}$ -extended point), and SCGC (geometrical center of side-chain). Table St8 contains detailed information about the descriptors. (A) Visualization prepared for parameters RES1, EXP1, (B) RES2, EXP1, (C) RES3, EXP1, (D) RES1, EXP2, (E) RES2, EXP2, (F) RES3, EXP2, (G) RES1, EXP3, (H) RES2, EXP3, (I) RES3, EXP3. (J–L) Visualization of superimposed 3D structures presented above

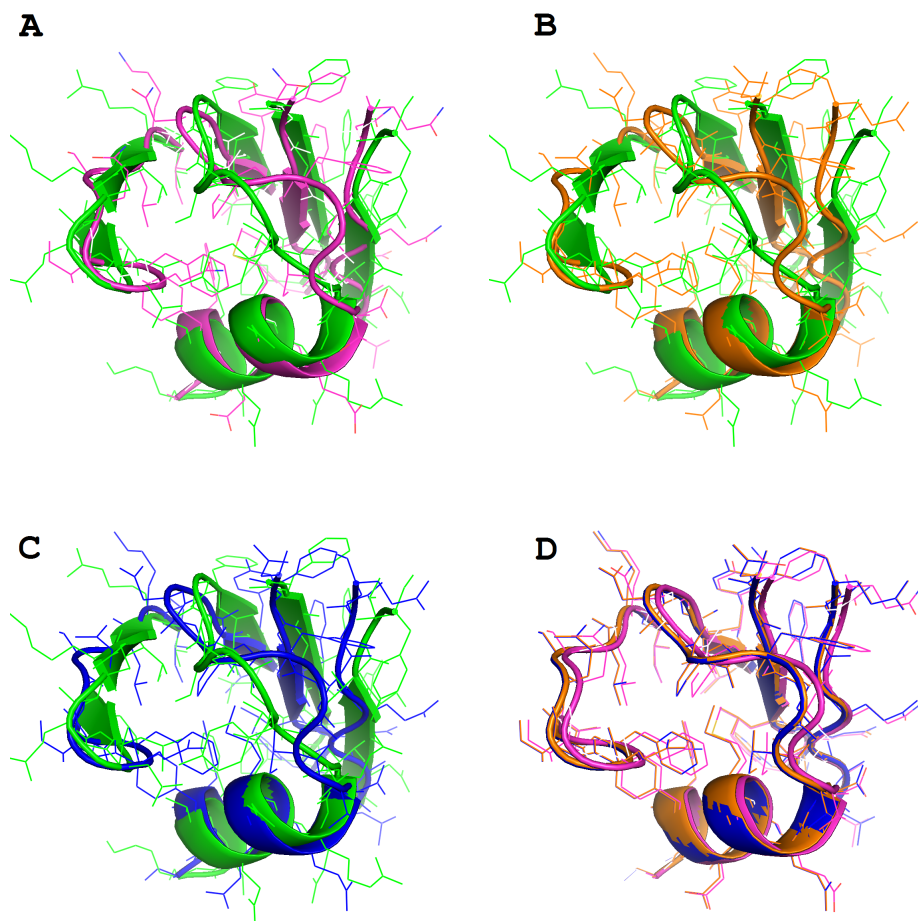

Figure Sf7: Visualization of structural alignments computed for descriptor pair d2cqca1\_A\_134\_LEU, d1u2fa\_A\_18\_MET. It is one of the most computationally interesting pairs listed in Table St5. The descriptors are composed of 11 elements. The tertiary structure of descriptor d2cqca1\_A\_134\_LEU is depicted in green, and the corresponding structural alignment of descriptor d1u2fa\_A\_18\_MET obtained because of the application of considered algorithms is depicted in magenta, orange, and blue, respectively. Table St9 contains detailed information about the descriptors and the resultant alignments. (A) Result of Algorithm 2 executed with the threshold parameter  $f = 1.75$ . (B) Result of Algorithm 3 executed with  $f = 1.75$ . (C) Result of Algorithm 4. (D) Visualization of all superimposed structural alignments of descriptor d1u2fa\_A\_18\_MET

## 2 Detailed results

Table St1: Summary of solutions quality for Algorithm 1

| <b>Algorithm 1 (1.75)</b> |                                          |                      |                                              |                          |                 |           |
|---------------------------|------------------------------------------|----------------------|----------------------------------------------|--------------------------|-----------------|-----------|
| descriptor elements count | coverage of similar descriptor pairs [%] | quality identity [%] | higher global RMSD, equal residues ratio [%] | lower residues ratio [%] | global RMSD [Å] |           |
|                           |                                          |                      |                                              |                          | avg.            | std. dev. |
| 3                         | 36.47                                    | 100.00               | 0.00                                         | 0.00                     | 1.50            | 0.33      |
| 4                         | 52.00                                    | 100.00               | 0.00                                         | 0.00                     | 1.76            | 0.45      |
| 5                         | 86.97                                    | 92.75                | 1.93                                         | 5.31                     | 2.02            | 0.58      |
| 6                         | 83.33                                    | 92.50                | 2.50                                         | 5.00                     | 1.96            | 0.58      |
| 7                         | 85.32                                    | 100.00               | 0.00                                         | 0.00                     | 2.03            | 0.56      |
| 8                         | 82.05                                    | 96.88                | 1.04                                         | 2.08                     | 2.15            | 0.49      |
| 9                         | 80.79                                    | 96.95                | 1.22                                         | 1.83                     | 2.03            | 0.57      |
| 10                        | 61.71                                    | 94.44                | 3.24                                         | 2.31                     | 2.39            | 0.60      |
| 11                        | 66.75                                    | 94.31                | 2.85                                         | 2.85                     | 2.26            | 0.52      |

| <b>Algorithm 1 (2.0)</b>  |                                          |                      |                                              |                          |                 |           |
|---------------------------|------------------------------------------|----------------------|----------------------------------------------|--------------------------|-----------------|-----------|
| descriptor elements count | coverage of similar descriptor pairs [%] | quality identity [%] | higher global RMSD, equal residues ratio [%] | lower residues ratio [%] | global RMSD [Å] |           |
|                           |                                          |                      |                                              |                          | avg.            | std. dev. |
| 3                         | 47.35                                    | 100.00               | 0.00                                         | 0.00                     | 1.65            | 0.41      |
| 4                         | 72.00                                    | 100.00               | 0.00                                         | 0.00                     | 1.98            | 0.55      |
| 5                         | 93.70                                    | 95.96                | 1.79                                         | 2.24                     | 2.15            | 0.65      |
| 6                         | 90.28                                    | 96.15                | 2.31                                         | 1.54                     | 2.10            | 0.67      |
| 7                         | 88.99                                    | 97.94                | 1.03                                         | 1.03                     | 2.09            | 0.59      |
| 8                         | 88.03                                    | 97.09                | 0.97                                         | 1.94                     | 2.25            | 0.56      |
| 9                         | 86.70                                    | 98.86                | 1.14                                         | 0.00                     | 2.13            | 0.63      |
| 10                        | 62.86                                    | 96.82                | 3.18                                         | 0.00                     | 2.42            | 0.62      |
| 11                        | 67.93                                    | 96.15                | 2.45                                         | 1.40                     | 2.29            | 0.54      |

| <b>Algorithm 1 (2.33)</b> |                                          |                      |                                              |                          |                 |           |
|---------------------------|------------------------------------------|----------------------|----------------------------------------------|--------------------------|-----------------|-----------|
| descriptor elements count | coverage of similar descriptor pairs [%] | quality identity [%] | higher global RMSD, equal residues ratio [%] | lower residues ratio [%] | global RMSD [Å] |           |
|                           |                                          |                      |                                              |                          | avg.            | std. dev. |
| 3                         | 70.88                                    | 100.00               | 0.00                                         | 0.00                     | 1.99            | 0.60      |
| 4                         | 92.00                                    | 100.00               | 0.00                                         | 0.00                     | 2.20            | 0.65      |
| 5                         | 91.60                                    | 96.79                | 1.83                                         | 1.38                     | 2.15            | 0.66      |
| 6                         | 90.97                                    | 97.71                | 2.29                                         | 0.00                     | 2.12            | 0.69      |
| 7                         | 88.99                                    | 100.00               | 0.00                                         | 0.00                     | 2.10            | 0.61      |
| 8                         | 85.47                                    | 99.00                | 1.00                                         | 0.00                     | 2.24            | 0.56      |
| 9                         | 87.19                                    | 98.87                | 1.13                                         | 0.00                     | 2.14            | 0.64      |
| 10                        | 62.29                                    | 96.79                | 3.21                                         | 0.00                     | 2.42            | 0.62      |
| 11                        | 67.70                                    | 96.84                | 2.46                                         | 0.70                     | 2.28            | 0.54      |

Table St2: Summary of solutions quality for Algorithm 2

| <b>Algorithm 2 (1.75)</b> |                                          |                      |                                              |                          |                 |           |
|---------------------------|------------------------------------------|----------------------|----------------------------------------------|--------------------------|-----------------|-----------|
| descriptor elements count | coverage of similar descriptor pairs [%] | quality identity [%] | higher global RMSD, equal residues ratio [%] | lower residues ratio [%] | global RMSD [Å] |           |
|                           |                                          |                      |                                              |                          | avg.            | std. dev. |
| 3                         | 36.47                                    | 100.00               | 0.00                                         | 0.00                     | 1.50            | 0.33      |
| 4                         | 52.00                                    | 100.00               | 0.00                                         | 0.00                     | 1.76            | 0.45      |
| 5                         | 88.24                                    | 92.38                | 1.90                                         | 5.71                     | 2.02            | 0.58      |
| 6                         | 84.72                                    | 92.62                | 2.46                                         | 4.92                     | 1.95            | 0.58      |
| 7                         | 88.99                                    | 100.00               | 0.00                                         | 0.00                     | 2.02            | 0.55      |
| 8                         | 86.32                                    | 95.05                | 0.99                                         | 3.96                     | 2.12            | 0.50      |
| 9                         | 85.22                                    | 95.38                | 2.31                                         | 2.31                     | 2.04            | 0.57      |
| 10                        | 75.43                                    | 92.05                | 4.17                                         | 3.79                     | 2.35            | 0.58      |
| 11                        | 79.33                                    | 91.62                | 3.89                                         | 4.49                     | 2.26            | 0.51      |

| <b>Algorithm 2 (2.0)</b>  |                                          |                      |                                              |                          |                 |           |
|---------------------------|------------------------------------------|----------------------|----------------------------------------------|--------------------------|-----------------|-----------|
| descriptor elements count | coverage of similar descriptor pairs [%] | quality identity [%] | higher global RMSD, equal residues ratio [%] | lower residues ratio [%] | global RMSD [Å] |           |
|                           |                                          |                      |                                              |                          | avg.            | std. dev. |
| 3                         | 47.35                                    | 100.00               | 0.00                                         | 0.00                     | 1.65            | 0.41      |
| 4                         | 72.00                                    | 100.00               | 0.00                                         | 0.00                     | 1.98            | 0.55      |
| 5                         | 96.64                                    | 95.65                | 1.74                                         | 2.61                     | 2.13            | 0.64      |
| 6                         | 93.75                                    | 96.30                | 2.22                                         | 1.48                     | 2.09            | 0.66      |
| 7                         | 96.33                                    | 98.10                | 0.95                                         | 0.95                     | 2.09            | 0.59      |
| 8                         | 97.44                                    | 95.61                | 0.88                                         | 3.51                     | 2.23            | 0.56      |
| 9                         | 94.09                                    | 96.34                | 2.62                                         | 1.05                     | 2.14            | 0.63      |
| 10                        | 86.00                                    | 90.37                | 4.98                                         | 4.65                     | 2.45            | 0.60      |
| 11                        | 86.70                                    | 91.78                | 3.56                                         | 4.66                     | 2.32            | 0.54      |

| <b>Algorithm 2 (2.33)</b> |                                          |                      |                                              |                          |                 |           |
|---------------------------|------------------------------------------|----------------------|----------------------------------------------|--------------------------|-----------------|-----------|
| descriptor elements count | coverage of similar descriptor pairs [%] | quality identity [%] | higher global RMSD, equal residues ratio [%] | lower residues ratio [%] | global RMSD [Å] |           |
|                           |                                          |                      |                                              |                          | avg.            | std. dev. |
| 3                         | 70.88                                    | 100.00               | 0.00                                         | 0.00                     | 1.99            | 0.60      |
| 4                         | 92.00                                    | 100.00               | 0.00                                         | 0.00                     | 2.20            | 0.65      |
| 5                         | 96.64                                    | 96.52                | 1.74                                         | 1.74                     | 2.14            | 0.65      |
| 6                         | 95.14                                    | 97.81                | 2.19                                         | 0.00                     | 2.11            | 0.68      |
| 7                         | 97.25                                    | 99.06                | 0.94                                         | 0.00                     | 2.11            | 0.60      |
| 8                         | 97.44                                    | 97.37                | 0.88                                         | 1.75                     | 2.23            | 0.56      |
| 9                         | 95.07                                    | 96.37                | 2.59                                         | 1.04                     | 2.15            | 0.63      |
| 10                        | 88.86                                    | 89.39                | 5.47                                         | 5.14                     | 2.48            | 0.61      |
| 11                        | 88.84                                    | 91.44                | 3.74                                         | 4.81                     | 2.35            | 0.55      |

Table St3: Summary of solutions quality for Algorithm 3

| <b>Algorithm 3 (1.75)</b> |                                          |                      |                                              |                          |                 |           |
|---------------------------|------------------------------------------|----------------------|----------------------------------------------|--------------------------|-----------------|-----------|
| descriptor elements count | coverage of similar descriptor pairs [%] | quality identity [%] | higher global RMSD, equal residues ratio [%] | lower residues ratio [%] | global RMSD [Å] |           |
|                           |                                          |                      |                                              |                          | avg.            | std. dev. |
| 3                         | 36.47                                    | 100.00               | 0.00                                         | 0.00                     | 1.50            | 0.33      |
| 4                         | 52.00                                    | 100.00               | 0.00                                         | 0.00                     | 1.76            | 0.45      |
| 5                         | 89.50                                    | 91.55                | 2.35                                         | 6.10                     | 2.02            | 0.58      |
| 6                         | 88.89                                    | 87.50                | 4.69                                         | 7.81                     | 2.01            | 0.61      |
| 7                         | 90.83                                    | 97.98                | 1.01                                         | 1.01                     | 2.03            | 0.56      |
| 8                         | 92.31                                    | 90.74                | 2.78                                         | 6.48                     | 2.17            | 0.53      |
| 9                         | 89.16                                    | 92.82                | 3.87                                         | 3.31                     | 2.08            | 0.58      |
| 10                        | 91.43                                    | 83.13                | 10.00                                        | 6.88                     | 2.51            | 0.62      |
| 11                        | 93.11                                    | 85.20                | 5.10                                         | 9.69                     | 2.36            | 0.55      |

| <b>Algorithm 3 (2.0)</b>  |                                          |                      |                                              |                          |                 |           |
|---------------------------|------------------------------------------|----------------------|----------------------------------------------|--------------------------|-----------------|-----------|
| descriptor elements count | coverage of similar descriptor pairs [%] | quality identity [%] | higher global RMSD, equal residues ratio [%] | lower residues ratio [%] | global RMSD [Å] |           |
|                           |                                          |                      |                                              |                          | avg.            | std. dev. |
| 3                         | 47.35                                    | 100.00               | 0.00                                         | 0.00                     | 1.65            | 0.41      |
| 4                         | 72.00                                    | 100.00               | 0.00                                         | 0.00                     | 1.98            | 0.55      |
| 5                         | 97.06                                    | 95.24                | 2.16                                         | 2.60                     | 2.14            | 0.65      |
| 6                         | 96.53                                    | 92.81                | 4.32                                         | 2.88                     | 2.13            | 0.68      |
| 7                         | 96.33                                    | 98.10                | 0.95                                         | 0.95                     | 2.09            | 0.59      |
| 8                         | 97.44                                    | 93.86                | 2.63                                         | 3.51                     | 2.23            | 0.57      |
| 9                         | 97.04                                    | 94.92                | 3.55                                         | 1.52                     | 2.17            | 0.63      |
| 10                        | 92.29                                    | 85.76                | 9.29                                         | 4.95                     | 2.52            | 0.62      |
| 11                        | 95.25                                    | 88.53                | 4.99                                         | 6.48                     | 2.38            | 0.56      |

| <b>Algorithm 3 (2.33)</b> |                                          |                      |                                              |                          |                 |           |
|---------------------------|------------------------------------------|----------------------|----------------------------------------------|--------------------------|-----------------|-----------|
| descriptor elements count | coverage of similar descriptor pairs [%] | quality identity [%] | higher global RMSD, equal residues ratio [%] | lower residues ratio [%] | global RMSD [Å] |           |
|                           |                                          |                      |                                              |                          | avg.            | std. dev. |
| 3                         | 70.88                                    | 100.00               | 0.00                                         | 0.00                     | 1.99            | 0.60      |
| 4                         | 92.00                                    | 100.00               | 0.00                                         | 0.00                     | 2.20            | 0.65      |
| 5                         | 97.06                                    | 96.10                | 2.16                                         | 1.73                     | 2.15            | 0.66      |
| 6                         | 97.22                                    | 95.00                | 4.29                                         | 0.71                     | 2.15            | 0.70      |
| 7                         | 97.25                                    | 99.06                | 0.94                                         | 0.00                     | 2.11            | 0.61      |
| 8                         | 97.44                                    | 94.74                | 2.63                                         | 2.63                     | 2.23            | 0.57      |
| 9                         | 98.03                                    | 94.97                | 3.52                                         | 1.51                     | 2.18            | 0.64      |
| 10                        | 92.29                                    | 86.07                | 9.29                                         | 4.64                     | 2.52            | 0.62      |
| 11                        | 95.49                                    | 89.05                | 4.73                                         | 6.22                     | 2.38            | 0.56      |

Table St4: Top 10 computationally expensive descriptor pairs (of longest processing times of structural comparison done by Algorithm 4). The descriptors were generated with the following expression for identification of in-contact residues:  $\text{OR}(\text{DISTANCE:SCGC} \leq 6.5, \text{AND}(\text{DISTANCE:SCGC} \leq \text{DISTANCE:CA} - 0.75, \text{DISTANCE:SCGC} \leq 8.0))$ . The structural comparisons were performed with CA ( $C_\alpha$ ) and SCGC (geometrical center of side-chain) as representative atom names. All descriptors are composed of 11 elements

| descriptor pair                        | algorithm (threshold) | aligned elements [%] | aligned residues [%] | global RMSD [Å] | processing time [ms] | descriptor pair                        | algorithm (threshold) | aligned elements [%] | aligned residues [%] | global RMSD [Å] | processing time [ms] |
|----------------------------------------|-----------------------|----------------------|----------------------|-----------------|----------------------|----------------------------------------|-----------------------|----------------------|----------------------|-----------------|----------------------|
| d1x5oa1_A_46_LEU<br>d2cpza1_A_421_PHE  | 1 (1.75)              | 100.00               | 100.00               | 1.92            | 7                    | d1og3a1_A_1183_LEU<br>d2cuha1_A_63_LEU | 1 (1.75)              | -                    | -                    | -               | 7                    |
|                                        | 1 (2.0)               | 100.00               | 100.00               | 1.92            | 8                    |                                        | 1 (2.0)               | -                    | -                    | -               | 6                    |
|                                        | 1 (2.33)              | 100.00               | 100.00               | 1.92            | 7                    |                                        | 1 (2.33)              | -                    | -                    | -               | 6                    |
|                                        | 2 (1.75)              | 100.00               | 100.00               | 1.92            | 39                   |                                        | 2 (1.75)              | 81.82                | 82.93                | 2.14            | 29                   |
|                                        | 2 (2.0)               | 100.00               | 100.00               | 1.92            | 39                   |                                        | 2 (2.0)               | 81.82                | 82.93                | 2.14            | 47                   |
|                                        | 2 (2.33)              | 100.00               | 100.00               | 1.92            | 40                   |                                        | 2 (2.33)              | 81.82                | 82.93                | 2.14            | 48                   |
|                                        | 3 (1.75)              | 100.00               | 100.00               | 1.92            | 146                  |                                        | 3 (1.75)              | 81.82                | 82.93                | 2.14            | 144                  |
|                                        | 3 (2.0)               | 100.00               | 100.00               | 1.92            | 147                  |                                        | 3 (2.0)               | 81.82                | 82.93                | 2.14            | 149                  |
|                                        | 3 (2.33)              | 100.00               | 100.00               | 1.92            | 148                  |                                        | 3 (2.33)              | 81.82                | 82.93                | 2.14            | 149                  |
|                                        | 4                     | 100.00               | 100.00               | 1.92            | 4526764              |                                        | 4                     | 90.91                | 95.12                | 3.29            | 2337319              |
| d1x4aa1_A_39_ILE<br>d2cpea1_A_377_LEU  | 1 (1.75)              | 100.00               | 100.00               | 2.01            | 7                    | d1g9oa_A_59_LEU<br>d1wf8a1_A_65_ILE    | 1 (1.75)              | 100.00               | 100.00               | 1.91            | 7                    |
|                                        | 1 (2.0)               | 100.00               | 100.00               | 2.01            | 7                    |                                        | 1 (2.0)               | 100.00               | 100.00               | 1.91            | 7                    |
|                                        | 1 (2.33)              | 100.00               | 100.00               | 2.01            | 7                    |                                        | 1 (2.33)              | 100.00               | 100.00               | 1.91            | 7                    |
|                                        | 2 (1.75)              | 100.00               | 100.00               | 2.01            | 41                   |                                        | 2 (1.75)              | 100.00               | 100.00               | 1.91            | 38                   |
|                                        | 2 (2.0)               | 100.00               | 100.00               | 2.01            | 41                   |                                        | 2 (2.0)               | 100.00               | 100.00               | 1.91            | 39                   |
|                                        | 2 (2.33)              | 100.00               | 100.00               | 2.01            | 42                   |                                        | 2 (2.33)              | 100.00               | 100.00               | 1.91            | 39                   |
|                                        | 3 (1.75)              | 100.00               | 100.00               | 2.01            | 150                  |                                        | 3 (1.75)              | 100.00               | 100.00               | 1.91            | 150                  |
|                                        | 3 (2.0)               | 100.00               | 100.00               | 2.01            | 151                  |                                        | 3 (2.0)               | 100.00               | 100.00               | 1.91            | 149                  |
|                                        | 3 (2.33)              | 100.00               | 100.00               | 2.01            | 150                  |                                        | 3 (2.33)              | 100.00               | 100.00               | 1.91            | 152                  |
|                                        | 4                     | 100.00               | 100.00               | 2.01            | 2227151              |                                        | 4                     | 100.00               | 100.00               | 1.91            | 2121192              |
| d2cdqa2_A_344_LEU<br>d2hmfa3_A_321_ILE | 1 (1.75)              | -                    | -                    | -               | 6                    | d1fmba2_A_150_ILE<br>d2fmba_A_64_VAL   | 1 (1.75)              | 100.00               | 100.00               | 2.88            | 6                    |
|                                        | 1 (2.0)               | -                    | -                    | -               | 7                    |                                        | 1 (2.0)               | 100.00               | 100.00               | 2.88            | 6                    |
|                                        | 1 (2.33)              | -                    | -                    | -               | 7                    |                                        | 1 (2.33)              | 100.00               | 100.00               | 2.88            | 6                    |
|                                        | 2 (1.75)              | 81.82                | 79.07                | 3.15            | 26                   |                                        | 2 (1.75)              | 100.00               | 100.00               | 2.88            | 39                   |
|                                        | 2 (2.0)               | 81.82                | 79.07                | 3.15            | 44                   |                                        | 2 (2.0)               | 100.00               | 100.00               | 2.88            | 39                   |
|                                        | 2 (2.33)              | 81.82                | 79.07                | 3.15            | 44                   |                                        | 2 (2.33)              | 100.00               | 100.00               | 2.88            | 39                   |
|                                        | 3 (1.75)              | 81.82                | 79.07                | 3.15            | 144                  |                                        | 3 (1.75)              | 100.00               | 100.00               | 2.88            | 168                  |
|                                        | 3 (2.0)               | 81.82                | 79.07                | 3.15            | 151                  |                                        | 3 (2.0)               | 100.00               | 100.00               | 2.88            | 168                  |
|                                        | 3 (2.33)              | 81.82                | 79.07                | 3.15            | 150                  |                                        | 3 (2.33)              | 100.00               | 100.00               | 2.88            | 168                  |
|                                        | 4                     | 81.82                | 83.72                | 3.01            | 2113848              |                                        | 4                     | 100.00               | 100.00               | 2.88            | 2005195              |
| d1cwva1_A_524_VAL<br>d2h26a1_A_206_CYS | 1 (1.75)              | -                    | -                    | -               | 9                    | d1fc6a3_A_199_ILE<br>d1rzxa_A_218_VAL  | 1 (1.75)              | 100.00               | 100.00               | 1.70            | 6                    |
|                                        | 1 (2.0)               | -                    | -                    | -               | 10                   |                                        | 1 (2.0)               | 100.00               | 100.00               | 1.70            | 7                    |
|                                        | 1 (2.33)              | -                    | -                    | -               | 9                    |                                        | 1 (2.33)              | 100.00               | 100.00               | 1.70            | 6                    |
|                                        | 2 (1.75)              | 81.82                | 90.00                | 2.05            | 29                   |                                        | 2 (1.75)              | 100.00               | 100.00               | 1.70            | 38                   |
|                                        | 2 (2.0)               | 81.82                | 90.00                | 2.05            | 47                   |                                        | 2 (2.0)               | 100.00               | 100.00               | 1.70            | 39                   |
|                                        | 2 (2.33)              | 81.82                | 90.00                | 2.05            | 46                   |                                        | 2 (2.33)              | 100.00               | 100.00               | 1.70            | 39                   |
|                                        | 3 (1.75)              | 90.91                | 95.00                | 3.19            | 149                  |                                        | 3 (1.75)              | 100.00               | 100.00               | 1.70            | 150                  |
|                                        | 3 (2.0)               | 90.91                | 95.00                | 3.19            | 153                  |                                        | 3 (2.0)               | 100.00               | 100.00               | 1.70            | 151                  |
|                                        | 3 (2.33)              | 90.91                | 95.00                | 3.19            | 159                  |                                        | 3 (2.33)              | 100.00               | 100.00               | 1.70            | 150                  |
|                                        | 4                     | 90.91                | 95.00                | 2.99            | 1951039              |                                        | 4                     | 100.00               | 100.00               | 1.70            | 1896075              |
| d2cqca1_A_134_LEU<br>d1x4aa1_A_39_ILE  | 1 (1.75)              | 100.00               | 100.00               | 1.86            | 10                   | d1cvja1_A_27_LEU<br>d2cqca1_A_134_LEU  | 1 (1.75)              | 100.00               | 100.00               | 1.91            | 7                    |
|                                        | 1 (2.0)               | 100.00               | 100.00               | 1.86            | 10                   |                                        | 1 (2.0)               | 100.00               | 100.00               | 1.91            | 7                    |
|                                        | 1 (2.33)              | 100.00               | 100.00               | 1.86            | 10                   |                                        | 1 (2.33)              | 100.00               | 100.00               | 1.91            | 7                    |
|                                        | 2 (1.75)              | 100.00               | 100.00               | 1.86            | 42                   |                                        | 2 (1.75)              | 100.00               | 100.00               | 1.91            | 38                   |
|                                        | 2 (2.0)               | 100.00               | 100.00               | 1.86            | 41                   |                                        | 2 (2.0)               | 100.00               | 100.00               | 1.91            | 38                   |
|                                        | 2 (2.33)              | 100.00               | 100.00               | 1.86            | 42                   |                                        | 2 (2.33)              | 100.00               | 100.00               | 1.91            | 38                   |
|                                        | 3 (1.75)              | 100.00               | 100.00               | 1.86            | 152                  |                                        | 3 (1.75)              | 100.00               | 100.00               | 1.91            | 146                  |
|                                        | 3 (2.0)               | 100.00               | 100.00               | 1.86            | 152                  |                                        | 3 (2.0)               | 100.00               | 100.00               | 1.91            | 147                  |
|                                        | 3 (2.33)              | 100.00               | 100.00               | 1.86            | 152                  |                                        | 3 (2.33)              | 100.00               | 100.00               | 1.91            | 149                  |
|                                        | 4                     | 100.00               | 100.00               | 1.86            | 1616547              |                                        | 4                     | 100.00               | 100.00               | 1.91            | 1424952              |



Table St5: Some of the most computationally interesting descriptor pairs, i.e., the ones of the greatest variability within the algorithms' output (in the sense of aligned residues). Each descriptor size (number of its elements) is represented by one pair. The descriptors were generated with the following expression for identification of in-contact residues:  $OR(DISTANCE:SCGC \leq 6.5, AND(DISTANCE:SCGC \leq DISTANCE:CA - 0.75, DISTANCE:SCGC \leq 8.0))$ . The structural comparisons were performed with CA ( $C_\alpha$ ) and SCGC (geometrical center of side-chain) as representative atom names

| descriptor pair (size)                     | algorithm (threshold)                    | aligned elements [%] | aligned residues [%] | global RMSD [Å] | processing time [ms] | descriptor pair (size)                  | algorithm (threshold)                    | aligned elements [%] | aligned residues [%] | global RMSD [Å] | processing time [ms] |        |
|--------------------------------------------|------------------------------------------|----------------------|----------------------|-----------------|----------------------|-----------------------------------------|------------------------------------------|----------------------|----------------------|-----------------|----------------------|--------|
| d3b5ha1_A_199_THR<br>d1lp9e1_E_111_SER (3) | 1 (1.75)                                 | -                    | -                    | -               | 1                    | d3deoa1_A_93_ARG<br>d1tvxa_A_43_GLU (4) | 1 (1.75)                                 | -                    | -                    | -               | 1                    |        |
|                                            | 1 (2.0)                                  | 100.00               | 100.00               | 2.23            | 4                    |                                         | 1 (2.0)                                  | 100.00               | 100.00               | 2.54            | 5                    |        |
|                                            | 1 (2.33)                                 | 100.00               | 100.00               | 2.23            | 5                    |                                         | 1 (2.33)                                 | 100.00               | 100.00               | 2.54            | 5                    |        |
|                                            | 2 (1.75)                                 | -                    | -                    | -               | 1                    |                                         | 2 (1.75)                                 | -                    | -                    | -               | 1                    |        |
|                                            | 2 (2.0)                                  | 100.00               | 100.00               | 2.23            | 8                    |                                         | 2 (2.0)                                  | 100.00               | 100.00               | 2.54            | 9                    |        |
|                                            | 2 (2.33)                                 | 100.00               | 100.00               | 2.23            | 8                    |                                         | 2 (2.33)                                 | 100.00               | 100.00               | 2.54            | 9                    |        |
|                                            | 3 (1.75)                                 | -                    | -                    | -               | 4                    |                                         | 3 (1.75)                                 | -                    | -                    | -               | 7                    |        |
|                                            | 3 (2.0)                                  | 100.00               | 100.00               | 2.23            | 10                   |                                         | 3 (2.0)                                  | 100.00               | 100.00               | 2.54            | 15                   |        |
|                                            | 3 (2.33)                                 | 100.00               | 100.00               | 2.23            | 10                   |                                         | 3 (2.33)                                 | 100.00               | 100.00               | 2.54            | 14                   |        |
| 4                                          | 100.00                                   | 100.00               | 2.23                 | 6               | 4                    | 100.00                                  | 100.00                                   | 2.54                 | 7                    |                 |                      |        |
| descriptor pair (size)                     | algorithm (threshold)                    | aligned elements [%] | aligned residues [%] | global RMSD [Å] | processing time [ms] | descriptor pair (size)                  | algorithm (threshold)                    | aligned elements [%] | aligned residues [%] | global RMSD [Å] | processing time [ms] |        |
|                                            | d1n4na_A_4_LYS<br>d2f0wa3_A_388_LEU (5)  | 1 (1.75)             | -                    | -               | -                    | 1                                       | d2hjga2_A_3_THR<br>d1g2913_1_250_ALA (6) | 1 (1.75)             | -                    | -               | -                    | 1      |
|                                            |                                          | 1 (2.0)              | 80.00                | 73.68           | 2.50                 | 5                                       |                                          | 1 (2.0)              | 83.33                | 90.00           | 2.76                 | 6      |
|                                            |                                          | 1 (2.33)             | 100.00               | 100.00          | 3.38                 | 5                                       |                                          | 1 (2.33)             | 100.00               | 100.00          | 3.06                 | 7      |
|                                            |                                          | 2 (1.75)             | -                    | -               | -                    | 1                                       |                                          | 2 (1.75)             | -                    | -               | -                    | 1      |
|                                            |                                          | 2 (2.0)              | 80.00                | 73.68           | 2.50                 | 4                                       |                                          | 2 (2.0)              | 83.33                | 90.00           | 2.76                 | 10     |
|                                            |                                          | 2 (2.33)             | 100.00               | 100.00          | 3.38                 | 9                                       |                                          | 2 (2.33)             | 100.00               | 100.00          | 3.06                 | 16     |
|                                            |                                          | 3 (1.75)             | 80.00                | 73.68           | 2.50                 | 14                                      |                                          | 3 (1.75)             | 83.33                | 90.00           | 2.76                 | 27     |
|                                            |                                          | 3 (2.0)              | 80.00                | 73.68           | 2.50                 | 18                                      |                                          | 3 (2.0)              | 83.33                | 90.00           | 2.76                 | 38     |
| 3 (2.33)                                   |                                          | 100.00               | 100.00               | 3.38            | 27                   | 3 (2.33)                                |                                          | 100.00               | 100.00               | 3.06            | 50                   |        |
| 4                                          | 100.00                                   | 100.00               | 3.38                 | 29              | 4                    | 100.00                                  | 100.00                                   | 3.06                 | 57                   |                 |                      |        |
| descriptor pair (size)                     | algorithm (threshold)                    | aligned elements [%] | aligned residues [%] | global RMSD [Å] | processing time [ms] | descriptor pair (size)                  | algorithm (threshold)                    | aligned elements [%] | aligned residues [%] | global RMSD [Å] | processing time [ms] |        |
|                                            | d2fka1_A_153_VAL<br>d2fka1_A_157_THR (7) | 1 (1.75)             | -                    | -               | -                    | 1                                       | d1bnba_A_10_GLY<br>d1fd3a_A_13_ALA (8)   | 1 (1.75)             | -                    | -               | -                    | 1      |
|                                            |                                          | 1 (2.0)              | 85.71                | 85.19           | 2.55                 | 6                                       |                                          | 1 (2.0)              | 87.50                | 89.66           | 2.96                 | 6      |
|                                            |                                          | 1 (2.33)             | 100.00               | 100.00          | 2.93                 | 8                                       |                                          | 1 (2.33)             | 100.00               | 100.00          | 3.15                 | 6      |
|                                            |                                          | 2 (1.75)             | -                    | -               | -                    | 2                                       |                                          | 2 (1.75)             | -                    | -               | -                    | 1      |
|                                            |                                          | 2 (2.0)              | 85.71                | 85.19           | 2.55                 | 12                                      |                                          | 2 (2.0)              | 87.50                | 89.66           | 2.96                 | 10     |
|                                            |                                          | 2 (2.33)             | 100.00               | 100.00          | 2.93                 | 18                                      |                                          | 2 (2.33)             | 100.00               | 100.00          | 3.15                 | 18     |
|                                            |                                          | 3 (1.75)             | 85.71                | 85.19           | 2.55                 | 46                                      |                                          | 3 (1.75)             | 87.50                | 89.66           | 2.96                 | 70     |
|                                            |                                          | 3 (2.0)              | 85.71                | 85.19           | 2.55                 | 59                                      |                                          | 3 (2.0)              | 87.50                | 89.66           | 2.96                 | 89     |
| 3 (2.33)                                   |                                          | 100.00               | 100.00               | 2.93            | 73                   | 3 (2.33)                                |                                          | 100.00               | 100.00               | 3.15            | 102                  |        |
| 4                                          | 100.00                                   | 100.00               | 2.93                 | 676             | 4                    | 100.00                                  | 100.00                                   | 3.15                 | 18                   |                 |                      |        |
| descriptor pair (size)                     | algorithm (threshold)                    | aligned elements [%] | aligned residues [%] | global RMSD [Å] | processing time [ms] | descriptor pair (size)                  | algorithm (threshold)                    | aligned elements [%] | aligned residues [%] | global RMSD [Å] | processing time [ms] |        |
|                                            | d2d9fa1_A_43_VAL<br>d2pu9b1_B_55_VAL (9) | 1 (1.75)             | 88.89                | 93.94           | 2.65                 | 6                                       | d2c60a1_A_49_PHE<br>d1k8rb_B_75_PHE (10) | 1 (1.75)             | 90.00                | 94.87           | 2.57                 | 7      |
|                                            |                                          | 1 (2.0)              | 100.00               | 100.00          | 3.49                 | 7                                       |                                          | 1 (2.0)              | 100.00               | 100.00          | 2.73                 | 6      |
|                                            |                                          | 1 (2.33)             | 100.00               | 100.00          | 3.49                 | 6                                       |                                          | 1 (2.33)             | 100.00               | 100.00          | 2.73                 | 8      |
|                                            |                                          | 2 (1.75)             | 88.89                | 93.94           | 2.65                 | 11                                      |                                          | 2 (1.75)             | 90.00                | 94.87           | 2.57                 | 14     |
|                                            |                                          | 2 (2.0)              | 100.00               | 100.00          | 3.49                 | 20                                      |                                          | 2 (2.0)              | 100.00               | 100.00          | 2.73                 | 24     |
|                                            |                                          | 2 (2.33)             | 100.00               | 100.00          | 3.49                 | 20                                      |                                          | 2 (2.33)             | 100.00               | 100.00          | 2.73                 | 23     |
|                                            |                                          | 3 (1.75)             | 88.89                | 93.94           | 2.65                 | 103                                     |                                          | 3 (1.75)             | 90.00                | 94.87           | 2.57                 | 133    |
|                                            |                                          | 3 (2.0)              | 100.00               | 100.00          | 3.49                 | 114                                     |                                          | 3 (2.0)              | 100.00               | 100.00          | 2.73                 | 139    |
| 3 (2.33)                                   |                                          | 100.00               | 100.00               | 3.49            | 114                  | 3 (2.33)                                |                                          | 100.00               | 100.00               | 2.73            | 141                  |        |
| 4                                          | 100.00                                   | 100.00               | 3.49                 | 3198            | 4                    | 100.00                                  | 100.00                                   | 2.73                 | 48766                |                 |                      |        |
| descriptor pair (size)                     | algorithm (threshold)                    | aligned elements [%] | aligned residues [%] | global RMSD [Å] | processing time [ms] | descriptor pair (size)                  | algorithm (threshold)                    | aligned elements [%] | aligned residues [%] | global RMSD [Å] | processing time [ms] |        |
|                                            | d2cqa1_A_134_LEU<br>d1n2fa_A_18_MET (11) | 1 (1.75)             | 81.82                | 84.44           | 2.09                 | 7                                       |                                          | 1 (1.75)             | 81.82                | 84.44           | 2.09                 | 14     |
|                                            |                                          | 1 (2.0)              | 100.00               | 100.00          | 2.55                 | 7                                       |                                          | 2 (2.0)              | 100.00               | 100.00          | 2.55                 | 39     |
|                                            |                                          | 1 (2.33)             | 100.00               | 100.00          | 2.55                 | 7                                       |                                          | 2 (2.33)             | 100.00               | 100.00          | 2.55                 | 40     |
|                                            |                                          | 2 (1.75)             | 81.82                | 84.44           | 2.09                 | 14                                      |                                          | 3 (1.75)             | 90.91                | 95.56           | 2.59                 | 142    |
|                                            |                                          | 2 (2.0)              | 100.00               | 100.00          | 2.55                 | 39                                      |                                          | 3 (2.0)              | 100.00               | 100.00          | 2.55                 | 155    |
|                                            |                                          | 2 (2.33)             | 100.00               | 100.00          | 2.55                 | 40                                      |                                          | 3 (2.33)             | 100.00               | 100.00          | 2.55                 | 150    |
|                                            |                                          | 3 (1.75)             | 90.91                | 95.56           | 2.59                 | 142                                     |                                          | 4                    | 100.00               | 100.00          | 2.55                 | 352344 |
|                                            |                                          | 3 (2.0)              | 100.00               | 100.00          | 2.55                 | 155                                     |                                          |                      |                      |                 |                      |        |
| 3 (2.33)                                   |                                          | 100.00               | 100.00               | 2.55            | 150                  |                                         |                                          |                      |                      |                 |                      |        |
| 4                                          | 100.00                                   | 100.00               | 2.55                 | 352344          |                      |                                         |                                          |                      |                      |                 |                      |        |

Table St6: Details of structural motifs constructed in the proximity of residue A123-VAL (d1e0ta1) according to the building concept of descriptors taking into consideration values 3, 5, 7 of element size and two types of expressions for identification of in-contact residues: “OR(DISTANCE:CBX  $\leq$  6.5, AND(DISTANCE:CBX  $\leq$  DISTANCE:CA – 0.75, DISTANCE:CBX  $\leq$  8.0))” [EXP1] and “OR(DISTANCE:SCGC  $\leq$  6.5, AND(DISTANCE:SCGC  $\leq$  DISTANCE:CA – 0.75, DISTANCE:SCGC  $\leq$  8.0))” [EXP2]. See Figure Sf4 for visualization of 3D structures of these motifs

| expression | element size | segments count | elements count | residues count | position                                                                                           | sequence                                                                  |
|------------|--------------|----------------|----------------|----------------|----------------------------------------------------------------------------------------------------|---------------------------------------------------------------------------|
| EXP1       | 3            | 6              | 8              | 22             | A92–A94<br>A116–A118<br>A122–A124<br>A131–A135<br>A141–A145<br>A159–A161                           | TFT<br>DLS<br>TVL<br>GMEVT<br>KVICK<br>NLP                                |
|            | 5            | 6              | 8              | 34             | A91–A95<br>A115–A119<br>A121–A125<br>A130–A136<br>A140–A146<br>A158–A162                           | FTFTT<br>TDLSV<br>NTVLV<br>IGMEVTA<br>NKVICKV<br>VNLPG                    |
|            | 7            | 5              | 8              | 45             | A90–A96<br>A114–A126<br>A129–A137<br>A139–A147<br>A157–A163                                        | TFTFTTD<br>TTDLSVGNLTVLVD<br>LIGMEVTAI<br>GNKVICKVL<br>GVNLPGV            |
| EXP2       | 3            | 8              | 11             | 30             | A92–A94<br>A107–A109<br>A112–A114<br>A116–A118<br>A122–A124<br>A131–A135<br>A141–A145<br>A157–A161 | TFT<br>AVT<br>GFT<br>DLS<br>TVL<br>GMEVT<br>KVICK<br>GVNLP                |
|            | 5            | 6              | 11             | 45             | A91–A95<br>A106–A119<br>A121–A125<br>A130–A136<br>A140–A146<br>A156–A162                           | FTFTT<br>VAVTYEGFTTDLSV<br>NTVLV<br>IGMEVTA<br>NKVICKV<br>KGVNLPG         |
|            | 7            | 5              | 11             | 56             | A90–A96<br>A105–A126<br>A129–A137<br>A139–A147<br>A155–A163                                        | TFTFTTD<br>MVAVTYEGFTTDLSVGNLTVLVD<br>LIGMEVTAI<br>GNKVICKVL<br>NKGVNLPGV |

Table St7: Details of structural motifs constructed in the proximity of residue A30-PHE (d2f5ya1) according to the building concept of descriptors taking into consideration values 3, 5, 7 of element size and two types of expressions for identification of in-contact residues: “OR(DISTANCE:CBX  $\leq$  6.5, AND(DISTANCE:CBX  $\leq$  DISTANCE:CA - 0.75, DISTANCE:CBX  $\leq$  8.0))” [EXP1] and “OR(DISTANCE:SCGC  $\leq$  6.5, AND(DISTANCE:SCGC  $\leq$  DISTANCE:CA - 0.75, DISTANCE:SCGC  $\leq$  8.0))” [EXP2]. See Figure Sf5 for visualization of 3D structures of these motifs

| expression | element size | segments count | elements count | residues count | position                                                                             | sequence                                                              |
|------------|--------------|----------------|----------------|----------------|--------------------------------------------------------------------------------------|-----------------------------------------------------------------------|
| EXP1       | 3            | 7              | 10             | 28             | A20-A22<br>A27-A31<br>A39-A44<br>A46-A50<br>A53-A55<br>A57-A59<br>A88-A90            | TIP<br>GFGFT<br>RVQAVD<br>GGPAE<br>GLQ<br>LDT<br>ILL                  |
|            | 5            | 4              | 10             | 40             | A19-A23<br>A26-A32<br>A38-A60<br>A87-A91                                             | ITIPR<br>DGFGFTI<br>VRVQAVDSGGPAERAGLQQLDTV<br>IILLV                  |
|            | 7            | 3              | 7              | 41             | A25-A33<br>A37-A61<br>A86-A92                                                        | KDGFGTIC<br>PVRVQAVDSGGPAERAGLQQLDTV<br>EILLVW                        |
| EXP2       | 3            | 8              | 11             | 29             | A20-A22<br>A28-A33<br>A39-A41<br>A48-A50<br>A53-A55<br>A59-A61<br>A79-A81<br>A86-A90 | TIP<br>FGFTIC<br>RVQ<br>PAE<br>GLQ<br>TVL<br>EIR<br>EILL              |
|            | 5            | 7              | 11             | 45             | A19-A23<br>A27-A34<br>A38-A42<br>A47-A56<br>A58-A62<br>A78-A82<br>A85-A91            | ITIPR<br>GFGFTICC<br>VRVQA<br>GPAERAGLQQ<br>DTVLLQ<br>HEIRS<br>SEILLV |
|            | 7            | 4              | 10             | 51             | A26-A35<br>A37-A43<br>A46-A63<br>A77-A92                                             | DGFGFTICCD<br>PVRVQAV<br>GGPAERAGLQQLDTVLLQ<br>AHEIRSCPSEILLVW        |

Table S8: Details of descriptors constructed in the proximity of residues A123-VAL (d1e0ta1), A30-PHE (d2f5ya1), and A2309-VAL (d2w0pa1) by various expressions for identification of in-contact residues published in the literature. See Figure S6 for the definitions of the expressions and for visualization of 3D structures of these descriptors

| descriptor         | expression | segments count | elements count | residues count | position                                                                               | sequence                                                               |
|--------------------|------------|----------------|----------------|----------------|----------------------------------------------------------------------------------------|------------------------------------------------------------------------|
| d1e0ta1_A_123_VAL  | EXP1       | 5              | 7              | 29             | A91–A95<br>A121–A125<br>A130–A136<br>A140–A146<br>A158–A162                            | FTFTT<br>NTVLV<br>IGMEVTA<br>NKVICKV<br>VNLPG                          |
|                    | EXP2       | 6              | 8              | 34             | A91–A95<br>A115–A119<br>A121–A125<br>A130–A136<br>A140–A146<br>A158–A162               | FTFTT<br>TDLSV<br>NTVLV<br>IGMEVTA<br>NKVICKV<br>VNLPG                 |
|                    | EXP3       | 5              | 13             | 48             | A91–A95<br>A106–A126<br>A129–A136<br>A140–A146<br>A156–A162                            | FTFTT<br>VAVTYEGFTTDLVSGNTVLVD<br>LIGMEVTA<br>NKVICKV<br>KGVNLPG       |
| d2f5ya1_A_30_PHE   | EXP1       | 3              | 6              | 25             | A26–A32<br>A38–A45<br>A47–A56                                                          | DGFGFTI<br>VRVQAVDS<br>GPAERAGLQQ                                      |
|                    | EXP2       | 4              | 10             | 40             | A19–A23<br>A26–A32<br>A38–A60<br>A87–A91                                               | ITIPR<br>DGFGFTI<br>VRVQAVDSGGPAERAGLQQLDTV<br>IILLV                   |
|                    | EXP3       | 6              | 12             | 50             | A19–A23<br>A26–A34<br>A38–A56<br>A58–A62<br>A78–A82<br>A85–A91                         | ITIPR<br>DGFGFTICC<br>VRVQAVDSGGPAERAGLQQ<br>DTVLQ<br>HEIRS<br>SEIILLV |
| d2w0pa1_A_2309_VAL | EXP1       | 5              | 7              | 30             | A2239–A2245<br>A2259–A2263<br>A2271–A2275<br>A2307–A2311<br>A2314–A2321                | HKVRAGG<br>FSIWT<br>LAIIV<br>VSVKF<br>EHIPDSPF                         |
|                    | EXP2       | 6              | 10             | 44             | A2239–A2250<br>A2257–A2263<br>A2271–A2275<br>A2293–A2297<br>A2307–A2311<br>A2314–A2323 | HKVRAGGPGLER<br>AEFSIWT<br>LAIIV<br>CGVAY<br>VSVKF<br>EHIPDSPFVV       |
|                    | EXP3       | 5              | 14             | 49             | A2239–A2250<br>A2257–A2263<br>A2269–A2275<br>A2293–A2297<br>A2306–A2323                | HKVRAGGPGLER<br>AEFSIWT<br>GGLAIIV<br>CGVAY<br>EVSVKFNEEHIPDSPFVV      |

Table St9: Details of descriptors d2cqca1\_A\_134\_LEU, d1u2fa\_A\_18\_MET, and their structural alignments obtained as results of Algorithms 1–4. This pair of descriptors is the greatest one among the pairs presented in Table St5. See Figure Sf7 for visualization of these structural alignments

| descriptor        | segments count | elements count | residues count | position                                         | sequence                                                    |
|-------------------|----------------|----------------|----------------|--------------------------------------------------|-------------------------------------------------------------|
| d2cqca1_A_134_LEU | 4              | 11             | 45             | A120–A140<br>A145–A151<br>A160–A166<br>A182–A191 | LGVFGLSLYTTERDLREVF<br>SKADVSIVYGF<br>AFVYFMELDGR<br>RIRV   |
| d1u2fa_A_18_MET   | 4              | 11             | 45             | A4–A24<br>A40–A46<br>A49–A55<br>A70–A79          | LYVGNIPFGITEEAM<br>MDFNLA<br>VQINQNF<br>AFLEFI<br>IFQGQSLKI |

| algorithm (threshold) | aligned elements [%] | aligned residues [%] | global RMSD [Å] | alignment                                                                                                                                  |
|-----------------------|----------------------|----------------------|-----------------|--------------------------------------------------------------------------------------------------------------------------------------------|
| 1 (1.75)              | 81.82                | 84.44                | 2.09            | LGVFG . . . . . LSLYTTERDLREVF<br>SKADVSIVYGF<br>AFVYFMELDGR<br>RIRV<br>LYVGNIPFGITE . . . . . EAMMDFN<br>LAVQINQNF<br>AFLEFI<br>IFQGQSLKI |
| 1 (2.0)               | 100.00               | 100.00               | 2.55            | LGVFGLSLYTTERDLREVF<br>SKADVSIVYGF<br>AFVYFMELDGR<br>RIRV<br>LYVGNIPFGITEEAMMDFN<br>LAVQINQNF<br>AFLEFI<br>IFQGQSLKI                       |
| 1 (2.33)              | 100.00               | 100.00               | 2.55            | LGVFGLSLYTTERDLREVF<br>SKADVSIVYGF<br>AFVYFMELDGR<br>RIRV<br>LYVGNIPFGITEEAMMDFN<br>LAVQINQNF<br>AFLEFI<br>IFQGQSLKI                       |
| 2 (1.75)              | 81.82                | 84.44                | 2.09            | LGVFG . . . . . LSLYTTERDLREVF<br>SKADVSIVYGF<br>AFVYFMELDGR<br>RIRV<br>LYVGNIPFGITE . . . . . EAMMDFN<br>LAVQINQNF<br>AFLEFI<br>IFQGQSLKI |
| 2 (2.0)               | 100.00               | 100.00               | 2.55            | LGVFGLSLYTTERDLREVF<br>SKADVSIVYGF<br>AFVYFMELDGR<br>RIRV<br>LYVGNIPFGITEEAMMDFN<br>LAVQINQNF<br>AFLEFI<br>IFQGQSLKI                       |
| 2 (2.33)              | 100.00               | 100.00               | 2.55            | LGVFGLSLYTTERDLREVF<br>SKADVSIVYGF<br>AFVYFMELDGR<br>RIRV<br>LYVGNIPFGITEEAMMDFN<br>LAVQINQNF<br>AFLEFI<br>IFQGQSLKI                       |
| 3 (1.75)              | 90.91                | 95.56                | 2.59            | LGVFG . . LSLYTTERDLREVF<br>SKADVSIVYGF<br>AFVYFMELDGR<br>RIRV<br>LYVGNIP . . FGITEEAMMDFN<br>LAVQINQNF<br>AFLEFI<br>IFQGQSLKI             |
| 3 (2.0)               | 100.00               | 100.00               | 2.55            | LGVFGLSLYTTERDLREVF<br>SKADVSIVYGF<br>AFVYFMELDGR<br>RIRV<br>LYVGNIPFGITEEAMMDFN<br>LAVQINQNF<br>AFLEFI<br>IFQGQSLKI                       |
| 3 (2.33)              | 100.00               | 100.00               | 2.55            | LGVFGLSLYTTERDLREVF<br>SKADVSIVYGF<br>AFVYFMELDGR<br>RIRV<br>LYVGNIPFGITEEAMMDFN<br>LAVQINQNF<br>AFLEFI<br>IFQGQSLKI                       |
| 4                     | 100.00               | 100.00               | 2.55            | LGVFGLSLYTTERDLREVF<br>SKADVSIVYGF<br>AFVYFMELDGR<br>RIRV<br>LYVGNIPFGITEEAMMDFN<br>LAVQINQNF<br>AFLEFI<br>IFQGQSLKI                       |
